# Supplementary material
Source: HighWire-hosted journal article supplement (https://bmjopen.bmj.com/content/12/4/e051154)
Supplement: inline-supplementary-material-4 [file inline-supplementary-material-4.pdf]

| <i>Predictors</i>                            | <b>Provider Involves Me</b> |             |                  | <b>Care Re</b>     |
|----------------------------------------------|-----------------------------|-------------|------------------|--------------------|
|                                              | <i>Odds Ratios</i>          | <i>CI</i>   | <i>p</i>         | <i>Odds Ratios</i> |
| <b>Age</b>                                   | 1.02                        | 1.00 , 1.03 | 0.075            | 1.02               |
| <b>Education</b>                             |                             |             |                  |                    |
| College Degree (referent)                    |                             |             |                  |                    |
| Less than College                            | 1.06                        | 0.51 , 2.20 | 0.878            | 1.01               |
| More than College                            | 3.04                        | 1.76 , 5.27 | <b>&lt;0.001</b> | 2.66               |
| <b>Income</b>                                |                             |             |                  |                    |
| >\$100,000 (referent)                        |                             |             |                  |                    |
| <\$50,000                                    | 0.29                        | 0.15 , 0.55 | <b>&lt;0.001</b> | 0.52               |
| \$50,000 to \$99,999                         | 0.34                        | 0.20 , 0.60 | <b>&lt;0.001</b> | 0.47               |
| <b>Race</b>                                  |                             |             |                  |                    |
| White (referent)                             |                             |             |                  |                    |
| Asian                                        | 0.61                        | 0.29 , 1.28 | 0.187            | 0.7                |
| Black/African American                       | 0.4                         | 0.18 , 0.91 | <b>0.029</b>     | 0.4                |
| Other                                        | 0.16                        | 0.02 , 1.23 | 0.077            | 0.4                |
| <b>Ethnicity</b>                             |                             |             |                  |                    |
| Not Hispanic (referent)                      |                             |             |                  |                    |
| Hispanic                                     | 0.18                        | 0.06 , 0.54 | <b>0.002</b>     | 0.56               |
| <b>Gender</b>                                |                             |             |                  |                    |
| Male (referent)                              |                             |             |                  |                    |
| Female                                       | 0.7                         | 0.43 , 1.13 | 0.143            | 0.93               |
| <b>Positive Aspects Score</b>                | 1.11                        | 1.06 , 1.15 | <b>&lt;0.001</b> | 1.1                |
| <b>Burden Score</b>                          | 1.05                        | 1.02 , 1.09 | <b>0.002</b>     | 1.07               |
| <b>Preparedness Score</b>                    | 1.24                        | 1.17 , 1.32 | <b>&lt;0.001</b> | 1.19               |
| <b>Relationship to CR</b>                    |                             |             |                  |                    |
| Spouse or Partner                            | 2                           | 1.22 , 3.27 | <b>0.006</b>     | 2.23               |
| Child                                        | 0.74                        | 0.37 , 1.48 | 0.39             | 1.21               |
| Parent or Grandparent                        | 0.83                        | 0.51 , 1.33 | 0.437            | 0.68               |
| <b>Poor Telemedicine Visit Quality</b>       | 2.58                        | 1.44 , 4.64 | <b>0.002</b>     | 2.28               |
| <b>Difficulty Connecting to Telemedicine</b> | 1.63                        | 0.95 , 2.82 | 0.078            | 1.33               |
| <b>Desire to Use Telemedicine Post-COVID</b> | 0.07                        | 0.01 , 0.56 | <b>0.012</b>     | 0.39               |
| <b>Condition</b>                             |                             |             |                  |                    |
| Diabetes                                     | 3.49                        | 2.13 , 5.71 | <b>&lt;0.001</b> | 3.05               |
| Dementia                                     | 0.64                        | 0.33 , 1.25 | 0.19             | 0.59               |
| <b>Method of Clinic Visit Communication</b>  |                             |             |                  |                    |
| Attending Clinic Visit                       | 3.02                        | 1.52 , 6.00 | <b>0.002</b>     | 2.92               |
| Printed Paper Summary                        | 2.61                        | 1.53 , 4.47 | <b>&lt;0.001</b> | 2.71               |
| Patient Recall                               | 2.12                        | 1.16 , 3.88 | <b>0.014</b>     | 2.26               |
| Patient Portal                               | 2.73                        | 1.60 , 4.64 | <b>&lt;0.001</b> | 3.04               |

| Recipient Involves Me |                  | Feel Up-To-Date on Information |             |                  | Feel More Isolated |             |
|-----------------------|------------------|--------------------------------|-------------|------------------|--------------------|-------------|
| <i>CI</i>             | <i>p</i>         | <i>Odds Ratios</i>             | <i>CI</i>   | <i>p</i>         | <i>Odds Ratios</i> | <i>CI</i>   |
| 1.00 , 1.03           | 0.059            | 1.02                           | 1.00 , 1.04 | <b>0.012</b>     | 1                  | 0.98 , 1.01 |
| 0.49 , 2.09           | 0.982            | 0.81                           | 0.42 , 1.57 | 0.54             | 0.66               | 0.29 , 1.50 |
| 1.54 , 4.58           | <b>&lt;0.001</b> | 1.42                           | 0.85 , 2.35 | 0.178            | 2.03               | 1.15 , 3.58 |
| 0.29 , 0.96           | <b>0.035</b>     | 0.64                           | 0.36 , 1.14 | 0.126            | 0.3                | 0.15 , 0.61 |
| 0.27 , 0.82           | <b>0.008</b>     | 0.67                           | 0.39 , 1.13 | 0.132            | 0.36               | 0.20 , 0.65 |
| 0.33 , 1.49           | 0.358            | 0.63                           | 0.30 , 1.30 | 0.209            | 0.6                | 0.25 , 1.42 |
| 0.17 , 0.94           | <b>0.036</b>     | 0.37                           | 0.16 , 0.84 | <b>0.017</b>     | 0.6                | 0.25 , 1.42 |
| 0.08 , 1.86           | 0.242            | 0.78                           | 0.23 , 2.69 | 0.7              | 1.49               | 0.43 , 5.16 |
| 0.25 , 1.24           | 0.151            | 0.38                           | 0.17 , 0.87 | <b>0.021</b>     | 0.84               | 0.37 , 1.87 |
| 0.58 , 1.50           | 0.765            | 1.11                           | 0.70 , 1.76 | 0.644            | 0.47               | 0.27 , 0.82 |
| 1.06 , 1.14           | <b>&lt;0.001</b> | 1.1                            | 1.06 , 1.15 | <b>&lt;0.001</b> | 1.14               | 1.08 , 1.20 |
| 1.03 , 1.10           | <b>&lt;0.001</b> | 1.02                           | 0.99 , 1.05 | 0.213            | 1.13               | 1.08 , 1.18 |
| 1.13 , 1.26           | <b>&lt;0.001</b> | 1.21                           | 1.15 , 1.28 | <b>&lt;0.001</b> | 1.26               | 1.18 , 1.35 |
| 1.36 , 3.66           | <b>0.001</b>     | 1                              | 0.61 , 1.64 | 0.991            | 2.28               | 1.35 , 3.85 |
| 0.64 , 2.32           | 0.557            | 1.07                           | 0.57 , 2.03 | 0.825            | 0.94               | 0.46 , 1.93 |
| 0.42 , 1.11           | 0.123            | 1.22                           | 0.77 , 1.93 | 0.392            | 0.56               | 0.33 , 0.95 |
| 1.28 , 4.05           | <b>0.005</b>     | 1.71                           | 1.01 , 2.88 | <b>0.045</b>     | 2.05               | 1.10 , 3.81 |
| 0.77 , 2.30           | 0.308            | 0.79                           | 0.46 , 1.36 | 0.395            | 2.76               | 1.51 , 5.07 |
| 0.13 , 1.22           | 0.105            | 0.84                           | 0.37 , 1.84 | 0.697            | 0.13               | 0.02 , 0.96 |
| 1.86 , 4.98           | <b>&lt;0.001</b> | 2.05                           | 1.28 , 3.30 | <b>0.003</b>     | 2.34               | 1.39 , 3.93 |
| 0.30 , 1.17           | 0.129            | 1.17                           | 0.65 , 2.11 | 0.596            | 1.05               | 0.54 , 2.04 |
| 1.46 , 5.80           | <b>0.002</b>     | 2.63                           | 1.40 , 4.94 | <b>0.003</b>     | 1.62               | 0.84 , 3.12 |
| 1.57 , 4.67           | <b>&lt;0.001</b> | 2.33                           | 1.40 , 3.86 | <b>0.001</b>     | 2.52               | 1.39 , 4.54 |
| 1.22 , 4.18           | <b>0.01</b>      | 1.35                           | 0.79 , 2.30 | 0.279            | 1.93               | 1.00 , 3.71 |
| 1.76 , 5.25           | <b>&lt;0.001</b> | 1.91                           | 1.18 , 3.11 | <b>0.009</b>     | 2.57               | 1.44 , 4.59 |

| ted | Feel More Anxious |                    |             | Feel Encouraged to be Involved |                    |             |                  |
|-----|-------------------|--------------------|-------------|--------------------------------|--------------------|-------------|------------------|
|     | <i>p</i>          | <i>Odds Ratios</i> | <i>CI</i>   | <i>p</i>                       | <i>Odds Ratios</i> | <i>CI</i>   | <i>p</i>         |
|     | 0.695             | 0.99               | 0.97 , 1.01 | 0.244                          | 1.02               | 1.00 , 1.03 | 0.058            |
|     | 0.319             | 1.2                | 0.51 , 2.80 | 0.679                          | 1.54               | 0.77 , 3.10 | 0.222            |
|     | <b>0.014</b>      | 3.61               | 1.92 , 6.76 | <b>&lt;0.001</b>               | 2.85               | 1.63 , 4.97 | <b>&lt;0.001</b> |
|     | <b>0.001</b>      | 0.2                | 0.09 , 0.42 | <b>&lt;0.001</b>               | 0.62               | 0.34 , 1.12 | 0.112            |
|     | <b>0.001</b>      | 0.22               | 0.12 , 0.43 | <b>&lt;0.001</b>               | 0.59               | 0.34 , 1.03 | 0.063            |
|     | 0.244             | 0.41               | 0.15 , 1.11 | 0.079                          | 0.52               | 0.23 , 1.14 | 0.104            |
|     | 0.244             | 1.09               | 0.51 , 2.32 | 0.832                          | 0.59               | 0.28 , 1.28 | 0.183            |
|     | 0.529             | 0.61               | 0.13 , 2.89 | 0.535                          | 0.63               | 0.17 , 2.41 | 0.504            |
|     | 0.667             | 0.52               | 0.21 , 1.32 | 0.171                          | 0.33               | 0.13 , 0.81 | <b>0.016</b>     |
|     | <b>0.007</b>      | 0.41               | 0.23 , 0.72 | <b>0.002</b>                   | 0.85               | 0.53 , 1.38 | 0.521            |
|     | <b>&lt;0.001</b>  | 1.11               | 1.06 , 1.17 | <b>&lt;0.001</b>               | 1.09               | 1.05 , 1.13 | <b>&lt;0.001</b> |
|     | <b>&lt;0.001</b>  | 1.15               | 1.10 , 1.21 | <b>&lt;0.001</b>               | 1.04               | 1.00 , 1.07 | <b>0.027</b>     |
|     | <b>&lt;0.001</b>  | 1.19               | 1.12 , 1.26 | <b>&lt;0.001</b>               | 1.24               | 1.17 , 1.31 | <b>&lt;0.001</b> |
|     | <b>0.002</b>      | 2.21               | 1.30 , 3.77 | <b>0.004</b>                   | 1.92               | 1.17 , 3.14 | <b>0.01</b>      |
|     | 0.864             | 0.88               | 0.42 , 1.86 | 0.743                          | 1.33               | 0.70 , 2.52 | 0.383            |
|     | <b>0.032</b>      | 0.67               | 0.39 , 1.14 | 0.141                          | 0.59               | 0.36 , 0.96 | <b>0.034</b>     |
|     | <b>0.023</b>      | 2.32               | 1.21 , 4.45 | <b>0.011</b>                   | 1.96               | 1.12 , 3.43 | <b>0.018</b>     |
|     | <b>0.001</b>      | 4.44               | 2.34 , 8.46 | <b>&lt;0.001</b>               | 1.46               | 0.83 , 2.54 | 0.187            |
|     | <b>0.045</b>      | 0.29               | 0.07 , 1.30 | 0.106                          | 0.19               | 0.04 , 0.86 | <b>0.031</b>     |
|     | <b>0.001</b>      | 3.29               | 1.93 , 5.61 | <b>&lt;0.001</b>               | 2.46               | 1.51 , 4.01 | <b>&lt;0.001</b> |
|     | 0.874             | 0.9                | 0.45 , 1.80 | 0.77                           | 0.81               | 0.43 , 1.54 | 0.526            |
|     | 0.153             | 1.67               | 0.85 , 3.29 | 0.138                          | 4.49               | 2.07 , 9.74 | <b>&lt;0.001</b> |
|     | <b>0.002</b>      | 3.82               | 1.96 , 7.41 | <b>&lt;0.001</b>               | 2.06               | 1.22 , 3.46 | <b>0.007</b>     |
|     | <b>0.049</b>      | 1.07               | 0.59 , 1.94 | 0.828                          | 1.46               | 0.83 , 2.58 | 0.189            |
|     | <b>0.001</b>      | 2.14               | 1.20 , 3.80 | <b>0.01</b>                    | 2.31               | 1.38 , 3.89 | <b>0.002</b>     |

| Contribute to discussions |             |                  | Feel like Questions are Being Answered |             |                  | Spend Less  |
|---------------------------|-------------|------------------|----------------------------------------|-------------|------------------|-------------|
| Odds Ratios               | CI          | p                | Odds Ratios                            | CI          | p                | Odds Ratios |
| 1.02                      | 1.00 , 1.04 | <b>0.023</b>     | 1.01                                   | 1.00 , 1.03 | 0.095            | 1.01        |
| 1.18                      | 0.59 , 2.35 | 0.639            | 0.88                                   | 0.42 , 1.83 | 0.727            | 1.44        |
| 2.49                      | 1.46 , 4.26 | <b>0.001</b>     | 2.69                                   | 1.57 , 4.61 | <b>&lt;0.001</b> | 3.3         |
| 0.43                      | 0.24 , 0.79 | <b>0.006</b>     | 0.49                                   | 0.27 , 0.90 | <b>0.022</b>     | 0.35        |
| 0.47                      | 0.27 , 0.81 | <b>0.006</b>     | 0.54                                   | 0.31 , 0.93 | <b>0.026</b>     | 0.29        |
| 0.56                      | 0.26 , 1.20 | 0.134            | 0.95                                   | 0.47 , 1.92 | 0.886            | 0.39        |
| 0.56                      | 0.26 , 1.20 | 0.134            | 0.38                                   | 0.16 , 0.90 | <b>0.028</b>     | 0.68        |
| 0.89                      | 0.26 , 3.06 | 0.854            | 0.63                                   | 0.17 , 2.41 | 0.504            | 0.97        |
| 0.31                      | 0.12 , 0.76 | <b>0.011</b>     | 0.26                                   | 0.10 , 0.70 | <b>0.008</b>     | 0.31        |
| 0.91                      | 0.57 , 1.45 | 0.681            | 0.83                                   | 0.52 , 1.35 | 0.459            | 0.51        |
| 1.11                      | 1.06 , 1.15 | <b>&lt;0.001</b> | 1.14                                   | 1.09 , 1.19 | <b>&lt;0.001</b> | 1.11        |
| 1.05                      | 1.02 , 1.08 | <b>0.004</b>     | 1.04                                   | 1.00 , 1.07 | <b>0.03</b>      | 1.15        |
| 1.23                      | 1.16 , 1.30 | <b>&lt;0.001</b> | 1.25                                   | 1.18 , 1.33 | <b>&lt;0.001</b> | 1.2         |
| 1.25                      | 0.76 , 2.06 | 0.371            | 1.28                                   | 0.78 , 2.11 | 0.336            | 2.58        |
| 1.36                      | 0.72 , 2.55 | 0.343            | 1.31                                   | 0.69 , 2.47 | 0.412            | 0.72        |
| 0.85                      | 0.53 , 1.35 | 0.485            | 1.05                                   | 0.65 , 1.68 | 0.851            | 0.66        |
| 1.37                      | 0.81 , 2.31 | 0.236            | 1.47                                   | 0.86 , 2.50 | 0.159            | 2.07        |
| 0.97                      | 0.56 , 1.68 | 0.92             | 0.9                                    | 0.52 , 1.56 | 0.704            | 3.64        |
| 0.08                      | 0.01 , 0.59 | <b>0.014</b>     | 0.17                                   | 0.04 , 0.74 | <b>0.019</b>     | 0.57        |
| 2.46                      | 1.52 , 3.99 | <b>&lt;0.001</b> | 2.89                                   | 1.77 , 4.72 | <b>&lt;0.001</b> | 2.9         |
| 0.53                      | 0.27 , 1.05 | 0.07             | 0.8                                    | 0.42 , 1.52 | 0.493            | 0.66        |
| 3.67                      | 1.80 , 7.46 | <b>&lt;0.001</b> | 3.47                                   | 2.71 , 5.46 | <b>&lt;0.001</b> | 1.7         |
| 2.28                      | 1.36 , 3.83 | <b>0.002</b>     | 3.05                                   | 1.75 , 5.30 | <b>&lt;0.001</b> | 2.46        |
| 1.36                      | 0.78 , 2.36 | 0.272            | 2.34                                   | 1.26 , 4.33 | <b>0.007</b>     | 1.42        |
| 2.76                      | 1.63 , 4.65 | <b>&lt;0.001</b> | 2.94                                   | 1.72 , 5.03 | <b>&lt;0.001</b> | 3.37        |

| Less Time Providing Care |                  | Easier to Attend Visit |             |                  |
|--------------------------|------------------|------------------------|-------------|------------------|
| <i>CI</i>                | <i>p</i>         | <i>Odds Ratios</i>     | <i>CI</i>   | <i>p</i>         |
| 0.99 , 1.03              | 0.51             | 1.01                   | 0.99 , 1.02 | 0.489            |
| 0.62 , 3.34              | 0.394            | 1                      | 0.49 , 2.04 | 0.996            |
| 1.73 , 6.30              | <b>&lt;0.001</b> | 2.02                   | 1.18 , 3.47 | <b>0.011</b>     |
| 0.17 , 0.70              | <b>0.003</b>     | 0.34                   | 0.18 , 0.64 | <b>0.001</b>     |
| 0.15 , 0.57              | <b>&lt;0.001</b> | 0.32                   | 0.18 , 0.58 | <b>&lt;0.001</b> |
| 0.15 , 1.05              | 0.063            | 0.34                   | 0.14 , 0.84 | <b>0.02</b>      |
| 0.30 , 1.57              | 0.37             | 0.55                   | 0.25 , 1.22 | 0.144            |
| 0.56 , 1.89              | 0.736            | 1.01                   | 0.30 , 3.49 | 0.981            |
| 0.11 , 0.92              | <b>0.035</b>     | 0.49                   | 0.22 , 1.12 | 0.092            |
| 0.29 , 0.90              | <b>0.02</b>      | 0.47                   | 0.28 , 0.78 | <b>0.004</b>     |
| 1.06 , 1.16              | <b>&lt;0.001</b> | 1.12                   | 1.07 , 1.17 | <b>&lt;0.001</b> |
| 1.10 , 1.21              | <b>&lt;0.001</b> | 1.13                   | 1.09 , 1.18 | <b>&lt;0.001</b> |
| 1.13 , 1.28              | <b>&lt;0.001</b> | 1.19                   | 1.12 , 1.25 | <b>&lt;0.001</b> |
| 1.50 , 4.45              | <b>0.001</b>     | 2.11                   | 1.28 , 3.47 | <b>0.003</b>     |
| 0.32 , 1.60              | 0.415            | 0.91                   | 0.46 , 1.79 | 0.778            |
| 0.38 , 1.15              | 0.141            | 0.73                   | 0.45 , 1.19 | 0.213            |
| 1.08 , 3.99              | <b>0.029</b>     | 1.82                   | 1.04 , 3.18 | <b>0.037</b>     |
| 1.88 , 7.05              | <b>&lt;0.001</b> | 3.37                   | 1.88 , 6.04 | <b>&lt;0.001</b> |
| 0.16 , 2.03              | 0.385            | 0.34                   | 0.10 , 1.21 | 0.096            |
| 1.69 , 5.00              | <b>&lt;0.001</b> | 2.73                   | 1.66 , 4.47 | <b>&lt;0.001</b> |
| 0.31 , 1.42              | 0.292            | 0.97                   | 0.52 , 1.82 | 0.92             |
| 0.84 , 3.42              | 0.139            | 1.97                   | 1.04 , 3.72 | <b>0.037</b>     |
| 1.32 , 4.58              | <b>0.005</b>     | 3.25                   | 1.83 , 5.76 | <b>&lt;0.001</b> |
| 0.75 , 2.71              | 0.286            | 2.14                   | 1.15 , 3.96 | <b>0.016</b>     |
| 1.76 , 6.46              | <b>&lt;0.001</b> | 4.78                   | 2.61 , 8.76 | <b>&lt;0.001</b> |
