# Supplementary material
Source: HighWire-hosted journal article supplement (https://bmjopen.bmj.com/content/12/4/e051154)
Supplement: inline-supplementary-material-5 [file inline-supplementary-material-5.pdf]

## Supplemental File E: Sensitivity Analysis

| <i>Predictors</i>                     | <b>Provider Involves Me</b> |             |              | <b>Care Re</b>     |
|---------------------------------------|-----------------------------|-------------|--------------|--------------------|
|                                       | <i>Odds Ratios</i>          | <i>CI</i>   | <i>p</i>     | <i>Odds Ratios</i> |
| Intercept                             | 0.48                        | 0.14 – 1.62 | 0.238        | 0.11               |
| <b>Age</b>                            |                             |             |              |                    |
| Less than 35 (Referent)               |                             |             |              |                    |
| 35-64                                 | 1.35                        | 0.72 – 2.52 | 0.353        | 1.28               |
| 65+                                   | 2.01                        | 0.71 – 5.68 | 0.189        | 1.05               |
| <b>Female Gender</b>                  |                             |             |              |                    |
|                                       | 0.93                        | 0.52 – 1.65 | 0.801        | 1.36               |
| <b>Education</b>                      |                             |             |              |                    |
| More than a College Degree (Referent) |                             |             |              |                    |
| College Degree or Less                | 0.47                        | 0.26 – 0.83 | <b>0.009</b> | 0.43               |
| <b>Race</b>                           |                             |             |              |                    |
| White (Referent)                      |                             |             |              |                    |
| Asian                                 | 1.09                        | 0.48 – 2.47 | 0.839        | 1.43               |
| Black or African American             | 0.69                        | 0.28 – 1.70 | 0.424        | 0.73               |
| <b>Hispanic</b>                       | 0.27                        | 0.09 – 0.83 | <b>0.022</b> | 0.9                |
| <b>Relationship to Caregiver</b>      |                             |             |              |                    |
| Friend (referent)                     |                             |             |              |                    |
| Parent or Grandparent                 | 1.24                        | 0.50 – 3.12 | 0.643        | 4.07               |
| Spouse or Partner                     | 1.87                        | 0.69 – 5.04 | 0.218        | 7.23               |
| <b>Comorbidity (&gt;1)</b>            |                             |             |              |                    |
|                                       | 0.91                        | 0.53 – 1.58 | 0.748        | 1.43               |
| <b>Rurality</b>                       |                             |             |              |                    |
|                                       | 0.9                         | 0.44 – 1.84 | 0.776        | 0.86               |

| <i>Predictors</i>                     | <b>Provider Involves Me</b> |             |              | <b>Care Re</b>     |
|---------------------------------------|-----------------------------|-------------|--------------|--------------------|
|                                       | <i>Odds Ratios</i>          | <i>CI</i>   | <i>p</i>     | <i>Odds Ratios</i> |
| Intercept                             | 0.13                        | 0.03 – 0.58 | <b>0.007</b> | 0.04               |
| <b>Age</b>                            |                             |             |              |                    |
| Less than 35 (Referent)               |                             |             |              |                    |
| 35-64                                 | 0.98                        | 0.50 – 1.93 | 0.954        | 1.12               |
| 65+                                   | 1.65                        | 0.56 – 4.93 | 0.366        | 1                  |
| <b>Female Gender</b>                  |                             |             |              |                    |
|                                       | 0.96                        | 0.53 – 1.74 | 0.889        | 1.42               |
| <b>Education</b>                      |                             |             |              |                    |
| More than a College Degree (Referent) |                             |             |              |                    |
| College Degree or Less                | 0.45                        | 0.25 – 0.83 | <b>0.011</b> | 0.42               |
| <b>Race</b>                           |                             |             |              |                    |
| White (Referent)                      |                             |             |              |                    |
| Asian                                 | 0.8                         | 0.34 – 1.89 | 0.617        | 1.19               |
| Black or African American             | 0.71                        | 0.28 – 1.82 | 0.48         | 0.76               |
| <b>Hispanic</b>                       | 0.26                        | 0.08 – 0.82 | <b>0.021</b> | 0.94               |
| <b>Relationship to Caregiver</b>      |                             |             |              |                    |
| Friend (referent)                     |                             |             |              |                    |
| Parent or Grandparent                 | 1.06                        | 0.40 – 2.77 | 0.908        | 3.8                |
| Spouse or Partner                     | 1.52                        | 0.54 – 4.32 | 0.429        | 6.41               |

|                            |      |              |                  |      |
|----------------------------|------|--------------|------------------|------|
| <b>Comorbidity (&gt;1)</b> | 0.98 | 0.56 – 1.72  | 0.935            | 1.49 |
| <b>Rurality</b>            | 0.96 | 0.46 – 2.00  | 0.904            | 0.88 |
| <b>High Preparedness</b>   | 7.14 | 2.88 – 17.66 | <b>&lt;0.001</b> | 3.86 |

| <i>Predictors</i>                     | <b>Provider Involves Me</b> |             |                  | <b>Care Re</b>     |
|---------------------------------------|-----------------------------|-------------|------------------|--------------------|
|                                       | <i>Odds Ratios</i>          | <i>CI</i>   | <i>p</i>         | <i>Odds Ratios</i> |
| Intercept                             | 0.23                        | 0.06 – 0.89 | <b>0.033</b>     | 0.06               |
| <b>Age</b>                            |                             |             |                  |                    |
| Less than 35 (Referent)               |                             |             |                  |                    |
| 35-64                                 | 1.22                        | 0.64 – 2.32 | 0.542            | 1.22               |
| 65+                                   | 2.43                        | 0.83 – 7.10 | 0.103            | 1.2                |
| <b>Female Gender</b>                  | 1.04                        | 0.58 – 1.87 | 0.9              | 1.49               |
| <b>Education</b>                      |                             |             |                  |                    |
| More than a College Degree (Referent) |                             |             |                  |                    |
| College Degree or Less                | 0.47                        | 0.26 – 0.84 | <b>0.011</b>     | 0.44               |
| <b>Race</b>                           |                             |             |                  |                    |
| White (Referent)                      |                             |             |                  |                    |
| Asian                                 | 0.77                        | 0.33 – 1.81 | 0.555            | 1.14               |
| Black or African American             | 0.65                        | 0.26 – 1.62 | 0.353            | 0.69               |
| <b>Hispanic</b>                       | 0.27                        | 0.09 – 0.82 | <b>0.022</b>     | 0.92               |
| <b>Relationship to Caregiver</b>      |                             |             |                  |                    |
| Friend (referent)                     |                             |             |                  |                    |
| Parent or Grandparent                 | 1.15                        | 0.45 – 2.94 | 0.776            | 4                  |
| Spouse or Partner                     | 1.54                        | 0.55 – 4.32 | 0.41             | 6.56               |
| <b>Comorbidity (&gt;1)</b>            | 1.01                        | 0.57 – 1.77 | 0.98             | 1.59               |
| <b>Rurality</b>                       | 0.9                         | 0.43 – 1.89 | 0.783            | 0.86               |
| <b>High Positivity</b>                | 3.42                        | 1.84 – 6.37 | <b>&lt;0.001</b> | 2.45               |

| Recipient Involves Me |              | Feel Up-To-Date on Information |             |              |             | Feel More Isolat |  |
|-----------------------|--------------|--------------------------------|-------------|--------------|-------------|------------------|--|
| CI                    | p            | Odds Ratios                    | CI          | p            | Odds Ratios | CI               |  |
| 0.02 – 0.47           | <b>0.003</b> | 0.31                           | 0.09 – 1.00 | <b>0.049</b> | 0.12        | 0.03 – 0.52      |  |
| 0.68 – 2.39           | 0.441        | 1.18                           | 0.66 – 2.11 | 0.566        | 2.22        | 1.10 – 4.48      |  |
| 0.36 – 3.11           | 0.928        | 2.31                           | 0.86 – 6.21 | 0.096        | 0.59        | 0.12 – 3.05      |  |
| 0.76 – 2.41           | 0.297        | 1.05                           | 0.61 – 1.80 | 0.868        | 0.53        | 0.28 – 1.02      |  |
| 0.24 – 0.77           | <b>0.005</b> | 0.75                           | 0.43 – 1.30 | 0.305        | 0.63        | 0.33 – 1.20      |  |
| 0.62 – 3.32           | 0.404        | 0.78                           | 0.35 – 1.70 | 0.525        | 1.15        | 0.44 – 3.04      |  |
| 0.28 – 1.88           | 0.518        | 0.49                           | 0.20 – 1.18 | 0.11         | 1.12        | 0.42 – 3.00      |  |
| 0.38 – 2.17           | 0.821        | 0.5                            | 0.21 – 1.18 | 0.113        | 1.29        | 0.53 – 3.19      |  |
| 1.16 – 14.19          | <b>0.028</b> | 1.96                           | 0.80 – 4.80 | 0.14         | 1.41        | 0.49 – 4.00      |  |
| 1.96 – 26.70          | <b>0.003</b> | 1.59                           | 0.60 – 4.25 | 0.354        | 2.25        | 0.75 – 6.81      |  |
| 0.83 – 2.47           | 0.197        | 1.14                           | 0.68 – 1.91 | 0.609        | 1.13        | 0.63 – 2.05      |  |
| 0.42 – 1.76           | 0.684        | 1.03                           | 0.53 – 2.02 | 0.928        | 1.32        | 0.57 – 3.06      |  |

| Recipient Involves Me |                  | Feel Up-To-Date on Information |             |                  |             | Feel More Isolat |  |
|-----------------------|------------------|--------------------------------|-------------|------------------|-------------|------------------|--|
| CI                    | p                | Odds Ratios                    | CI          | p                | Odds Ratios | CI               |  |
| 0.01 – 0.21           | <b>&lt;0.001</b> | 0.07                           | 0.02 – 0.31 | <b>&lt;0.001</b> | 0.02        | 0.00 – 0.12      |  |
| 0.58 – 2.16           | 0.736            | 0.94                           | 0.50 – 1.77 | 0.853            | 1.76        | 0.83 – 3.76      |  |
| 0.33 – 3.03           | 0.995            | 2.13                           | 0.73 – 6.26 | 0.168            | 0.51        | 0.10 – 2.69      |  |
| 0.79 – 2.56           | 0.243            | 1.07                           | 0.61 – 1.89 | 0.814            | 0.52        | 0.26 – 1.03      |  |
| 0.23 – 0.78           | <b>0.006</b>     | 0.75                           | 0.42 – 1.36 | 0.346            | 0.63        | 0.32 – 1.24      |  |
| 0.50 – 2.81           | 0.693            | 0.56                           | 0.25 – 1.28 | 0.17             | 0.84        | 0.31 – 2.30      |  |
| 0.29 – 2.01           | 0.578            | 0.49                           | 0.19 – 1.22 | 0.123            | 1.27        | 0.46 – 3.53      |  |
| 0.38 – 2.33           | 0.892            | 0.47                           | 0.19 – 1.18 | 0.109            | 1.44        | 0.54 – 3.79      |  |
| 1.07 – 13.49          | <b>0.039</b>     | 1.74                           | 0.68 – 4.45 | 0.248            | 1.23        | 0.42 – 3.66      |  |
| 1.70 – 24.19          | <b>0.006</b>     | 1.26                           | 0.45 – 3.53 | 0.663            | 1.68        | 0.53 – 5.38      |  |

|             |              |      |              |                  |       |              |
|-------------|--------------|------|--------------|------------------|-------|--------------|
| 0.85 – 2.59 | 0.16         | 1.24 | 0.72 – 2.12  | 0.436            | 1.19  | 0.65 – 2.20  |
| 0.42 – 1.83 | 0.737        | 1.09 | 0.54 – 2.20  | 0.818            | 1.4   | 0.59 – 3.34  |
| 1.78 – 8.38 | <b>0.001</b> | 7.63 | 3.29 – 17.70 | <b>&lt;0.001</b> | 14.95 | 3.51 – 63.79 |

| Recipient Involves Me |                  | Feel Up-To-Date on Information |             |                  | Feel More Isolated |             |
|-----------------------|------------------|--------------------------------|-------------|------------------|--------------------|-------------|
| <i>CI</i>             | <i>p</i>         | <i>Odds Ratios</i>             | <i>CI</i>   | <i>p</i>         | <i>Odds Ratios</i> | <i>CI</i>   |
| 0.01 – 0.28           | <b>&lt;0.001</b> | 0.1                            | 0.03 – 0.40 | <b>0.001</b>     | 0.05               | 0.01 – 0.24 |
| 0.65 – 2.30           | 0.539            | 1.11                           | 0.60 – 2.04 | 0.74             | 1.99               | 0.97 – 4.06 |
| 0.40 – 3.61           | 0.751            | 3.21                           | 1.11 – 9.26 | <b>0.031</b>     | 0.71               | 0.13 – 3.75 |
| 0.83 – 2.68           | 0.181            | 1.22                           | 0.69 – 2.15 | 0.501            | 0.59               | 0.30 – 1.15 |
| 0.24 – 0.80           | <b>0.007</b>     | 0.76                           | 0.43 – 1.37 | 0.367            | 0.65               | 0.33 – 1.27 |
| 0.48 – 2.70           | 0.761            | 0.5                            | 0.22 – 1.15 | 0.105            | 0.83               | 0.31 – 2.22 |
| 0.27 – 1.81           | 0.454            | 0.42                           | 0.17 – 1.04 | 0.062            | 1.06               | 0.39 – 2.89 |
| 0.38 – 2.24           | 0.858            | 0.48                           | 0.19 – 1.18 | 0.109            | 1.4                | 0.56 – 3.53 |
| 1.13 – 14.11          | <b>0.031</b>     | 1.89                           | 0.74 – 4.86 | 0.186            | 1.27               | 0.44 – 3.71 |
| 1.74 – 24.71          | <b>0.005</b>     | 1.24                           | 0.44 – 3.54 | 0.684            | 1.8                | 0.57 – 5.71 |
| 0.91 – 2.77           | 0.102            | 1.39                           | 0.81 – 2.38 | 0.237            | 1.25               | 0.68 – 2.31 |
| 0.42 – 1.79           | 0.691            | 1.06                           | 0.52 – 2.15 | 0.878            | 1.37               | 0.57 – 3.29 |
| 1.35 – 4.46           | <b>0.003</b>     | 5.05                           | 2.69 – 9.50 | <b>&lt;0.001</b> | 4.29               | 2.04 – 9.03 |

| ted<br><i>p</i> | Feel More Anxious  |             |              | Feel Encouraged to be Involved |             |              |  |
|-----------------|--------------------|-------------|--------------|--------------------------------|-------------|--------------|--|
|                 | <i>Odds Ratios</i> | <i>CI</i>   | <i>p</i>     | <i>Odds Ratios</i>             | <i>CI</i>   | <i>p</i>     |  |
| <b>0.004</b>    | 0.32               | 0.08 – 1.28 | 0.106        | 0.34                           | 0.10 – 1.15 | 0.083        |  |
| <b>0.026</b>    | 1.28               | 0.64 – 2.56 | 0.483        | 1.42                           | 0.76 – 2.63 | 0.272        |  |
| 0.532           | 0.2                | 0.02 – 1.70 | 0.141        | 1.69                           | 0.59 – 4.82 | 0.325        |  |
| 0.059           | 0.59               | 0.30 – 1.14 | 0.115        | 1.12                           | 0.64 – 1.98 | 0.686        |  |
| 0.161           | 0.36               | 0.19 – 0.71 | <b>0.003</b> | 0.5                            | 0.28 – 0.89 | <b>0.018</b> |  |
| 0.775           | 0.8                | 0.27 – 2.37 | 0.689        | 0.9                            | 0.38 – 2.12 | 0.809        |  |
| 0.815           | 2.1                | 0.85 – 5.19 | 0.106        | 1                              | 0.43 – 2.34 | 0.993        |  |
| 0.574           | 0.76               | 0.28 – 2.06 | 0.585        | 0.49                           | 0.19 – 1.27 | 0.141        |  |
| 0.523           | 1.51               | 0.52 – 4.42 | 0.453        | 1.35                           | 0.54 – 3.37 | 0.515        |  |
| 0.149           | 2.23               | 0.72 – 6.91 | 0.163        | 1.98                           | 0.74 – 5.30 | 0.174        |  |
| 0.681           | 0.99               | 0.54 – 1.80 | 0.961        | 1.02                           | 0.60 – 1.75 | 0.935        |  |
| 0.523           | 0.89               | 0.40 – 1.98 | 0.77         | 0.9                            | 0.45 – 1.82 | 0.768        |  |

| ted<br><i>p</i>  | Feel More Anxious  |             |              | Feel Encouraged to be Involved |             |              |  |
|------------------|--------------------|-------------|--------------|--------------------------------|-------------|--------------|--|
|                  | <i>Odds Ratios</i> | <i>CI</i>   | <i>p</i>     | <i>Odds Ratios</i>             | <i>CI</i>   | <i>p</i>     |  |
| <b>&lt;0.001</b> | 0.13               | 0.03 – 0.64 | <b>0.012</b> | 0.08                           | 0.02 – 0.36 | <b>0.001</b> |  |
| 0.142            | 0.96               | 0.46 – 2.00 | 0.906        | 1.06                           | 0.54 – 2.08 | 0.864        |  |
| 0.426            | 0.16               | 0.02 – 1.38 | 0.096        | 1.44                           | 0.48 – 4.34 | 0.521        |  |
| 0.059            | 0.57               | 0.29 – 1.13 | 0.107        | 1.16                           | 0.64 – 2.11 | 0.615        |  |
| 0.178            | 0.35               | 0.18 – 0.70 | <b>0.003</b> | 0.48                           | 0.26 – 0.89 | <b>0.019</b> |  |
| 0.741            | 0.58               | 0.19 – 1.77 | 0.343        | 0.66                           | 0.27 – 1.62 | 0.37         |  |
| 0.649            | 2.25               | 0.89 – 5.67 | 0.087        | 1.07                           | 0.44 – 2.63 | 0.879        |  |
| 0.465            | 0.76               | 0.27 – 2.14 | 0.598        | 0.47                           | 0.17 – 1.30 | 0.145        |  |
| 0.704            | 1.24               | 0.41 – 3.72 | 0.699        | 1.13                           | 0.43 – 2.96 | 0.797        |  |
| 0.381            | 1.66               | 0.52 – 5.31 | 0.394        | 1.57                           | 0.56 – 4.45 | 0.392        |  |

|                  |                  |                          |              |              |                                       |              |                  |
|------------------|------------------|--------------------------|--------------|--------------|---------------------------------------|--------------|------------------|
|                  | 0.574            | 1.01                     | 0.54 – 1.87  | 0.986        | 1.1                                   | 0.63 – 1.92  | 0.739            |
|                  | 0.442            | 0.92                     | 0.40 – 2.08  | 0.837        | 0.94                                  | 0.45 – 1.95  | 0.861            |
|                  | <b>&lt;0.001</b> | 4.87                     | 1.90 – 12.47 | <b>0.001</b> | 8.69                                  | 3.30 – 22.86 | <b>&lt;0.001</b> |
| <b>ted</b>       |                  | <b>Feel More Anxious</b> |              |              | <b>Feel Encouraged to be involved</b> |              |                  |
| <i>p</i>         |                  | <i>Odds Ratios</i>       | <i>CI</i>    | <i>p</i>     | <i>Odds Ratios</i>                    | <i>CI</i>    | <i>p</i>         |
| <b>&lt;0.001</b> |                  | 0.18                     | 0.04 – 0.80  | <b>0.024</b> | 0.16                                  | 0.04 – 0.60  | <b>0.007</b>     |
|                  | 0.059            | 1.12                     | 0.55 – 2.27  | 0.752        | 1.29                                  | 0.68 – 2.43  | 0.436            |
|                  | 0.685            | 0.24                     | 0.03 – 2.06  | 0.191        | 2.06                                  | 0.70 – 6.09  | 0.191            |
|                  | 0.119            | 0.63                     | 0.32 – 1.25  | 0.188        | 1.26                                  | 0.70 – 2.26  | 0.437            |
|                  | 0.207            | 0.37                     | 0.19 – 0.73  | <b>0.004</b> | 0.5                                   | 0.28 – 0.91  | <b>0.022</b>     |
|                  | 0.707            | 0.6                      | 0.20 – 1.80  | 0.364        | 0.63                                  | 0.26 – 1.52  | 0.304            |
|                  | 0.909            | 2.05                     | 0.82 – 5.11  | 0.125        | 0.94                                  | 0.39 – 2.25  | 0.893            |
|                  | 0.474            | 0.79                     | 0.29 – 2.19  | 0.657        | 0.47                                  | 0.18 – 1.26  | 0.136            |
|                  | 0.66             | 1.25                     | 0.42 – 3.75  | 0.685        | 1.25                                  | 0.49 – 3.19  | 0.645            |
|                  | 0.316            | 1.75                     | 0.54 – 5.62  | 0.348        | 1.63                                  | 0.58 – 4.55  | 0.352            |
|                  | 0.469            | 1.03                     | 0.55 – 1.91  | 0.928        | 1.16                                  | 0.67 – 2.02  | 0.598            |
|                  | 0.475            | 0.88                     | 0.39 – 2.00  | 0.766        | 0.89                                  | 0.43 – 1.85  | 0.763            |
|                  | <b>&lt;0.001</b> | 3.19                     | 1.57 – 6.49  | <b>0.001</b> | 3.67                                  | 1.97 – 6.85  | <b>&lt;0.001</b> |

| Contribute to discussions |        |        |   | Feel like Questions are Being Answered |        |              | Spend Less       |              |        |
|---------------------------|--------|--------|---|----------------------------------------|--------|--------------|------------------|--------------|--------|
| Odds                      | Ratios | CI     | p | Odds                                   | Ratios | CI           | p                | Odds         | Ratios |
| 0.58                      | 0.18   | – 1.85 |   | 0.354                                  | 0.25   | 0.07 – 0.98  |                  | <b>0.047</b> | 0.26   |
| 1.46                      | 0.79   | – 2.69 |   | 0.224                                  | 0.92   | 0.50 – 1.73  |                  | 0.806        | 1.4    |
| 2.31                      | 0.83   | – 6.45 |   | 0.109                                  | 1.3    | 0.46 – 3.70  |                  | 0.619        | 0.93   |
| 0.87                      | 0.50   | – 1.53 |   | 0.634                                  | 0.96   | 0.54 – 1.71  |                  | 0.892        | 0.73   |
| 0.45                      | 0.26   | – 0.80 |   | <b>0.007</b>                           | 0.34   | 0.19 – 0.61  | <b>&lt;0.001</b> |              | 0.56   |
| 0.89                      | 0.39   | – 2.07 |   | 0.792                                  | 1.65   | 0.73 – 3.69  |                  | 0.227        | 0.72   |
| 0.94                      | 0.41   | – 2.19 |   | 0.889                                  | 0.65   | 0.26 – 1.67  |                  | 0.372        | 1.18   |
| 0.44                      | 0.17   | – 1.14 |   | 0.091                                  | 0.38   | 0.14 – 1.08  |                  | 0.07         | 0.43   |
| 1.37                      | 0.56   | – 3.32 |   | 0.491                                  | 3.28   | 1.07 – 10.07 |                  | <b>0.038</b> | 1.57   |
| 1.23                      | 0.46   | – 3.26 |   | 0.677                                  | 3      | 0.91 – 9.88  |                  | 0.071        | 2.89   |
| 1.4                       | 0.82   | – 2.37 |   | 0.216                                  | 1.53   | 0.89 – 2.64  |                  | 0.128        | 1.03   |
| 0.63                      | 0.32   | – 1.23 |   | 0.176                                  | 0.93   | 0.45 – 1.92  |                  | 0.853        | 0.7    |

| Contribute to discussions |        |        |   | Feel like Questions are Being Answered |        |             | Spend Less       |              |        |
|---------------------------|--------|--------|---|----------------------------------------|--------|-------------|------------------|--------------|--------|
| Odds                      | Ratios | CI     | p | Odds                                   | Ratios | CI          | p                | Odds         | Ratios |
| 0.15                      | 0.03   | – 0.62 |   | <b>0.009</b>                           | 0.05   | 0.01 – 0.28 |                  | <b>0.001</b> | 0.09   |
| 1.12                      | 0.58   | – 2.17 |   | 0.733                                  | 0.69   | 0.35 – 1.38 |                  | 0.295        | 1.06   |
| 2.01                      | 0.67   | – 6.03 |   | 0.21                                   | 1.12   | 0.37 – 3.44 |                  | 0.838        | 0.77   |
| 0.89                      | 0.49   | – 1.61 |   | 0.71                                   | 1      | 0.54 – 1.83 |                  | 0.988        | 0.73   |
| 0.43                      | 0.23   | – 0.79 |   | <b>0.007</b>                           | 0.31   | 0.16 – 0.58 | <b>&lt;0.001</b> |              | 0.56   |
| 0.65                      | 0.27   | – 1.56 |   | 0.336                                  | 1.22   | 0.52 – 2.86 |                  | 0.655        | 0.55   |
| 1.01                      | 0.41   | – 2.44 |   | 0.991                                  | 0.66   | 0.25 – 1.76 |                  | 0.406        | 1.24   |
| 0.43                      | 0.16   | – 1.19 |   | 0.103                                  | 0.36   | 0.12 – 1.08 |                  | 0.067        | 0.42   |
| 1.13                      | 0.44   | – 2.89 |   | 0.793                                  | 2.83   | 0.89 – 8.95 |                  | 0.077        | 1.34   |
| 0.92                      | 0.33   | – 2.57 |   | 0.867                                  | 2.32   | 0.68 – 7.93 |                  | 0.181        | 2.34   |

| 1.55                      | 0.89 – 2.70  | 0.12             | 1.69                                   | 0.95 – 2.99  | 0.073            | 1.06               |
|---------------------------|--------------|------------------|----------------------------------------|--------------|------------------|--------------------|
| 0.64                      | 0.32 – 1.31  | 0.223            | 1.02                                   | 0.48 – 2.16  | 0.968            | 0.72               |
| 8.06                      | 3.26 – 19.93 | <b>&lt;0.001</b> | 9.28                                   | 3.48 – 24.77 | <b>&lt;0.001</b> | 5                  |
| Contribute to discussions |              |                  | Feel like Questions are Being Answered |              |                  | Spend Le           |
| <i>Odds Ratios</i>        | <i>CI</i>    | <i>p</i>         | <i>Odds Ratios</i>                     | <i>CI</i>    | <i>p</i>         | <i>Odds Ratios</i> |
| 0.24                      | 0.07 – 0.90  | <b>0.034</b>     | 0.09                                   | 0.02 – 0.40  | <b>0.002</b>     | 0.1                |
| 1.35                      | 0.72 – 2.53  | 0.357            | 0.86                                   | 0.45 – 1.64  | 0.644            | 1.21               |
| 2.99                      | 1.03 – 8.68  | <b>0.044</b>     | 1.74                                   | 0.58 – 5.22  | 0.322            | 1.15               |
| 0.99                      | 0.55 – 1.79  | 0.979            | 1.14                                   | 0.62 – 2.09  | 0.669            | 0.82               |
| 0.45                      | 0.25 – 0.82  | <b>0.008</b>     | 0.33                                   | 0.18 – 0.61  | <b>&lt;0.001</b> | 0.58               |
| 0.6                       | 0.25 – 1.45  | 0.258            | 1.15                                   | 0.49 – 2.68  | 0.747            | 0.5                |
| 0.87                      | 0.36 – 2.08  | 0.753            | 0.57                                   | 0.22 – 1.51  | 0.26             | 1.15               |
| 0.43                      | 0.16 – 1.15  | 0.093            | 0.39                                   | 0.14 – 1.13  | 0.083            | 0.43               |
| 1.23                      | 0.49 – 3.09  | 0.655            | 3.11                                   | 0.99 – 9.79  | 0.052            | 1.35               |
| 0.94                      | 0.34 – 2.63  | 0.91             | 2.35                                   | 0.68 – 8.11  | 0.177            | 2.29               |
| 1.64                      | 0.95 – 2.85  | 0.078            | 1.79                                   | 1.01 – 3.18  | <b>0.046</b>     | 1.12               |
| 0.61                      | 0.30 – 1.24  | 0.171            | 0.95                                   | 0.44 – 2.02  | 0.889            | 0.68               |
| 4.27                      | 2.26 – 8.05  | <b>&lt;0.001</b> | 4.95                                   | 2.53 – 9.69  | <b>&lt;0.001</b> | 4.84               |



| Less Time Providing Care |          | Easier to Attend Visit |             |              |  |
|--------------------------|----------|------------------------|-------------|--------------|--|
| CI                       | <i>p</i> | Odds Ratios            | CI          | <i>p</i>     |  |
| 0.06 – 1.06              | 0.06     | 0.3                    | 0.08 – 1.07 | 0.064        |  |
| 0.68 – 2.85              | 0.358    | 1.81                   | 0.95 – 3.45 | 0.073        |  |
| 0.25 – 3.46              | 0.914    | 1.45                   | 0.46 – 4.60 | 0.527        |  |
| 0.38 – 1.39              | 0.336    | 0.44                   | 0.24 – 0.81 | <b>0.008</b> |  |
| 0.29 – 1.07              | 0.081    | 0.85                   | 0.47 – 1.54 | 0.595        |  |
| 0.25 – 2.08              | 0.544    | 0.51                   | 0.19 – 1.36 | 0.18         |  |
| 0.46 – 3.02              | 0.731    | 0.87                   | 0.36 – 2.12 | 0.764        |  |
| 0.14 – 1.32              | 0.14     | 0.62                   | 0.26 – 1.52 | 0.3          |  |
| 0.50 – 4.90              | 0.439    | 1.4                    | 0.53 – 3.68 | 0.5          |  |
| 0.88 – 9.49              | 0.081    | 2.02                   | 0.72 – 5.63 | 0.182        |  |
| 0.56 – 1.88              | 0.935    | 1.16                   | 0.67 – 2.03 | 0.589        |  |
| 0.32 – 1.52              | 0.364    | 0.86                   | 0.42 – 1.76 | 0.673        |  |

| Less Time Providing Care |              | Easier to Attend Visit |             |              |  |
|--------------------------|--------------|------------------------|-------------|--------------|--|
| CI                       | <i>p</i>     | Odds Ratios            | CI          | <i>p</i>     |  |
| 0.02 – 0.49              | <b>0.005</b> | 0.1                    | 0.02 – 0.46 | <b>0.003</b> |  |
| 0.50 – 2.25              | 0.887        | 1.42                   | 0.72 – 2.80 | 0.317        |  |
| 0.20 – 2.92              | 0.701        | 1.2                    | 0.37 – 3.93 | 0.757        |  |
| 0.38 – 1.43              | 0.359        | 0.43                   | 0.23 – 0.80 | <b>0.008</b> |  |
| 0.29 – 1.09              | 0.089        | 0.87                   | 0.47 – 1.61 | 0.652        |  |
| 0.19 – 1.63              | 0.28         | 0.39                   | 0.14 – 1.06 | 0.064        |  |
| 0.47 – 3.25              | 0.66         | 0.94                   | 0.38 – 2.34 | 0.891        |  |
| 0.13 – 1.34              | 0.142        | 0.63                   | 0.25 – 1.59 | 0.325        |  |
| 0.42 – 4.30              | 0.619        | 1.22                   | 0.45 – 3.31 | 0.7          |  |
| 0.69 – 7.94              | 0.171        | 1.61                   | 0.55 – 4.67 | 0.385        |  |

|              |              |      |              |                  |
|--------------|--------------|------|--------------|------------------|
| 0.57 – 1.96  | 0.859        | 1.22 | 0.69 – 2.15  | 0.491            |
| 0.33 – 1.59  | 0.42         | 0.9  | 0.43 – 1.88  | 0.772            |
| 1.87 – 13.40 | <b>0.001</b> | 5.18 | 2.22 – 12.11 | <b>&lt;0.001</b> |

| Less Time Providing Care |                  | Easier to Attend Visit |             |                  |
|--------------------------|------------------|------------------------|-------------|------------------|
| CI                       | p                | Odds Ratios            | CI          | p                |
| 0.02 – 0.50              | <b>0.005</b>     | 0.13                   | 0.03 – 0.54 | <b>0.005</b>     |
| 0.58 – 2.52              | 0.604            | 1.62                   | 0.84 – 3.14 | 0.152            |
| 0.30 – 4.49              | 0.835            | 1.82                   | 0.56 – 5.93 | 0.321            |
| 0.42 – 1.61              | 0.564            | 0.47                   | 0.25 – 0.88 | <b>0.018</b>     |
| 0.30 – 1.14              | 0.113            | 0.89                   | 0.48 – 1.64 | 0.703            |
| 0.17 – 1.46              | 0.201            | 0.36                   | 0.13 – 0.98 | <b>0.046</b>     |
| 0.44 – 2.99              | 0.779            | 0.85                   | 0.34 – 2.10 | 0.724            |
| 0.13 – 1.35              | 0.147            | 0.65                   | 0.26 – 1.62 | 0.357            |
| 0.42 – 4.33              | 0.617            | 1.23                   | 0.45 – 3.31 | 0.689            |
| 0.66 – 7.92              | 0.19             | 1.6                    | 0.55 – 4.66 | 0.39             |
| 0.60 – 2.09              | 0.72             | 1.3                    | 0.73 – 2.30 | 0.374            |
| 0.30 – 1.52              | 0.343            | 0.85                   | 0.40 – 1.81 | 0.68             |
| 2.23 – 10.53             | <b>&lt;0.001</b> | 3.99                   | 2.09 – 7.61 | <b>&lt;0.001</b> |
