# Supplementary material
Source: HighWire-hosted journal article supplement (https://bmjopen.bmj.com/content/12/4/e051154)

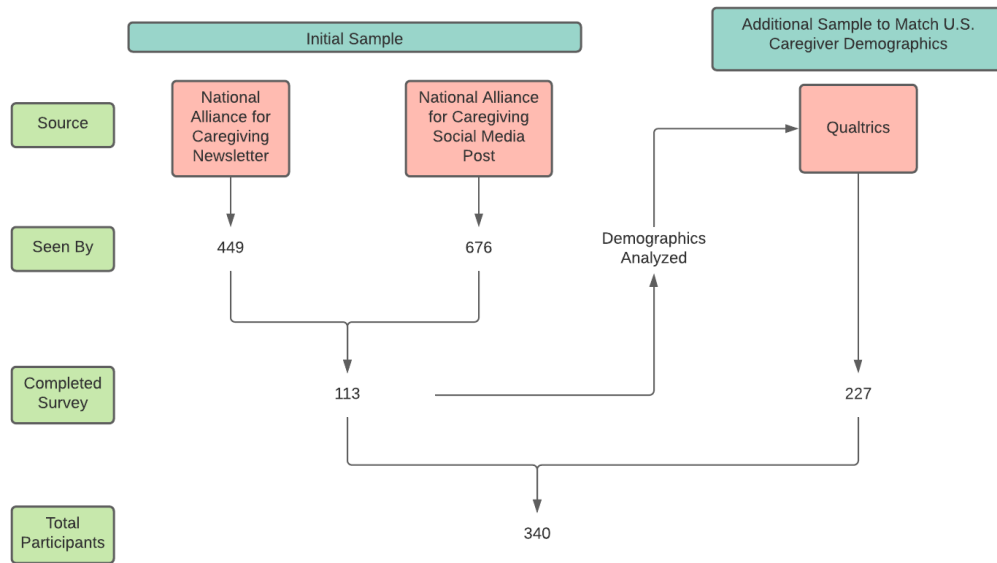

Supplemental File C: Sample Source

Supplement: inline-supplementary-material-3 [file inline-supplementary-material-3.pdf]
